# Supplementary material
Source: PubMed Central journal article supplement (PMC9544363)
Supplement: PROT-89-1722-s001.pdf [file PROT-89-1722-s001.pdf]

## Supplementary figures

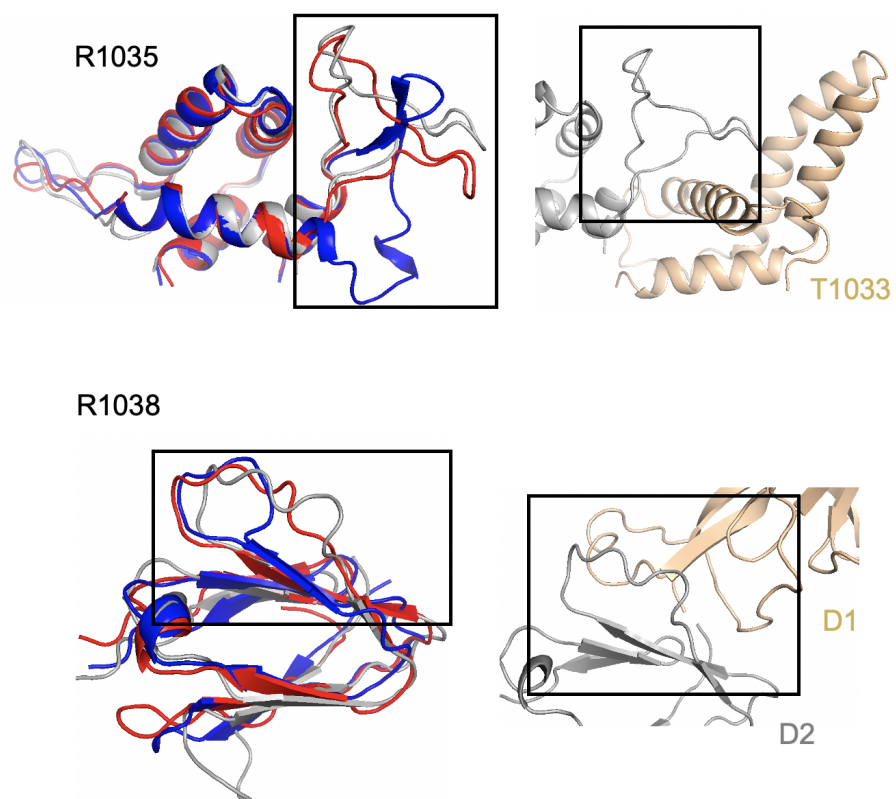

**Fig S1.** Refinement failures due to missing inter-domain contacts. Native, starting, and refined models are shown in gray, red, and blue, respectively. Other domains having direct interactions but not included in the refinement scenario are shown in ivory color in right panels.
